RESEARCH ARTICLE

# Undiagnosed Cryptic Diversity in Small, Microendemic Frogs (*Leptolalax*) from the Central Highlands of Vietnam

Jodi J. L. Rowley<sup>1\*</sup>, Dao T. A. Tran<sup>2</sup>, Greta J. Frankham<sup>1</sup>, Anthony H. Dekker<sup>3</sup>, Duong T. T. Le<sup>2</sup>, Truong Q. Nguyen<sup>4</sup>, Vinh Q. Dau<sup>4</sup>, Huy D. Hoang<sup>2</sup>

**1** Australian Museum Research Institute, Australian Museum, Sydney, New South Wales, Australia, **2** Faculty of Biology, University of Science-Ho Chi Minh City, Ho Chi Minh City, Vietnam, **3** Federation University (Ballarat), Mt Helen, Victoria, Australia, **4** Institute of Ecology and Biological Resources, Vietnam Academy of Science and Technology, Cau Giay, Hanoi, Vietnam

\* [jodi.rowley@austmus.gov.au](mailto:jodi.rowley@austmus.gov.au)

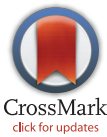

**OPEN ACCESS**

**Citation:** Rowley JLL, Tran DTA, Frankham GJ, Dekker AH, Le DTT, Nguyen TQ, et al. (2015) Undiagnosed Cryptic Diversity in Small, Microendemic Frogs (*Leptolalax*) from the Central Highlands of Vietnam. PLoS ONE 10(5): e0128382. doi:10.1371/journal.pone.0128382

**Academic Editor:** Robert Guralnick, University of Colorado, UNITED STATES

**Received:** October 1, 2014

**Accepted:** April 25, 2015

**Published:** May 28, 2015

**Copyright:** © 2015 Rowley et al. This is an open access article distributed under the terms of the [Creative Commons Attribution License](https://creativecommons.org/licenses/by/4.0/), which permits unrestricted use, distribution, and reproduction in any medium, provided the original author and source are credited.

**Data Availability Statement:** All relevant data are within the paper and its Supporting Information files.

**Funding:** Funding for aspects of this study was provided by ADM Capital Foundation, Conservation International, the National Geographic Conservation Trust, a grant from The John D. and Catherine T. MacArthur Foundation to the North Carolina Museum of Natural Sciences to JR; The Alexander Koenig Society (Alexander Koenig Gesellschaft – AKG), The Alexander Koenig Foundations (Alexander Koenig Stiftung – AKS), IDEA WILD, Nagao Natural Environment Foundation (NEF), the Vietnamese

## Abstract

A major obstacle in prioritizing species or habitats for conservation is the degree of unrecognized diversity hidden within complexes of morphologically similar, “cryptic” species. Given that amphibians are one of the most threatened groups of organisms on the planet, our inability to diagnose their true diversity is likely to have significant conservation consequences. This is particularly true in areas undergoing rapid deforestation, such as Southeast Asia. The Southeast Asian genus *Leptolalax* is a group of small-bodied, morphologically conserved frogs that inhabit the forest-floor. We examined a particularly small-bodied and morphologically conserved subset, the *Leptolalax applebyi* group, using a combination of molecular, morphometric, and acoustic data to identify previously unknown diversity within. In order to predict the geographic distribution of the group, estimate the effects of habitat loss and assess the degree of habitat protection, we used our locality data to perform ecological niche modelling using MaxEnt. Molecular (mtDNA and nuDNA), acoustic and subtle morphometric differences revealed a significant underestimation of diversity in the *L. applebyi* group; at least two-thirds of the diversity may be unrecognized. Patterns of diversification and microendemism in the group appear driven by limited dispersal, likely due to their small body size, with several lineages restricted to watershed basins. The *L. applebyi* group is predicted to have historically occurred over a large area of the Central Highlands of Vietnam, a considerable portion of which has already been deforested. Less than a quarter of the remaining forest predicted to be suitable for the group falls within current protected areas. The predicted distribution of the *L. applebyi* group extends into unsurveyed watershed basins, each potentially containing unsampled diversity, some of which may have already been lost due to deforestation. Current estimates of amphibian diversity based on morphology alone are misleading, and accurate alpha taxonomy is essential to accurately prioritize conservation efforts.

Ministry of Education and Training (322 Project), and the German Academic Exchange Service (DAAD) to DT; Project TN3/T07 of the National Program Tay Nguyen III Project TN3/T07 of the National Program Tay Nguyen III and the Alexander von Humboldt Stiftung/Foundation (VIE 114344) to TN. The funders had no role in study design, data collection and analysis, decision to publish, or preparation of the manuscript.

**Competing Interests:** The authors have declared that no competing interests exist.

## Introduction

The current biodiversity crisis urgently requires the delineation of conservation priorities for both species and habitats [1–3]. One of the first steps towards conservation prioritization is to measure and map biodiversity, but our understanding of species diversity, and how it varies spatially, is limited [4,5]. A major obstacle in understanding biodiversity is the extent of unrecognized diversity hidden within complexes of morphologically similar species [6]. Speciation is not always accompanied by morphological change, and our inability to recognize these “cryptic” species may mask true species diversity, with serious conservation consequences [6–9].

Given that amphibians are one of the most threatened groups of organisms on the planet [10], our inability to diagnose and map their true diversity is likely to have significant consequences for their conservation [7]. Since cryptic species are likely to have smaller geographical ranges than the previously recognized ‘species’, and small range size generally is the strongest predictor of a species’ risk of extinction, they are likely to be more threatened [11–13]. If they remain undetected, there is a risk that they will become extinct without our knowledge [14].

It is becoming increasingly apparent that a significant proportion of amphibian diversity remains hidden within unrecognized, cryptic species complexes. Amphibians commonly exhibit conservative morphological evolution that may conceal true species diversity [9, 15–19]. This is likely due in part to their dependence non-visual (acoustic) cues for species recognition and mate choice. As such, molecular and bioacoustic tools are often required to reveal amphibian cryptic species (e.g. [13, 16, 20–22]).

A significant proportion the amphibian species diversity in Southeast Asia appears to be hidden within cryptic species groups. To date, every molecular study examining widespread Southeast Asian amphibian species throughout their ranges has revealed unrecognized species diversity [13, 23–25]. The majority of this diversity is found only in intact forest [13], an alarming fact given that the region has the highest relative deforestation rate of any major tropical region [26, 27]. The apparently high level of undiagnosed diversity, coupled with ongoing deforestation, raises the possibility that Southeast Asia will lose species of amphibian before they are discovered.

The genus *Leptolalax* Dubois 1983 is a group of small, morphologically conserved frogs that inhabit the forest floor and rocky streams in hilly evergreen forest throughout Southeast Asia, southern China and northeastern India [28]. Most of the 41 known *Leptolalax* species are small (<60 mm SVL) and brown, resembling their forest floor substrate, and lack striking interspecific differences in their appearance. Their habitat is often difficult to access and their advertisement calls faint and insect-like (e.g. [29–31]). As a result, *Leptolalax* are both difficult to detect in the field and to identify to species. Increased use of acoustic and molecular data in delineating species boundaries in the group, along with additional survey effort, has resulted in more than doubling of the known species since 2000 [28].

Three species of very small *Leptolalax* (<30 mm SVL) have been described in recent years from the Central Highlands (or the Tay Nguyen Plateau) of Vietnam and adjacent northeastern Cambodia: *Leptolalax applebyi* Rowley & Cao 2009 from the Kon Tum Plateau in the north of the Highlands, *L. bidoupensis* Rowley *et al.* 2011 from the south of the Highlands, in the Langbian Plateau, and *L. melicus* Rowley *et al.* 2010 from northwestern slopes of the Highlands in northeastern Cambodia (Fig 1). These three species, the ‘*L. applebyi* group’, are distinguished from all other species of *Leptolalax* by a combination of their very small size, quiet, rasping advertisement calls, morphological similarity (including a dark brownish red ventral surface with white speckling and black markings on the flanks) and mitochondrial DNA [29–32]. They also share similar breeding habitat, preferring the trickles at headwaters of small mountain streams and seeps, as opposed to the larger streams that the other *Leptolalax* are

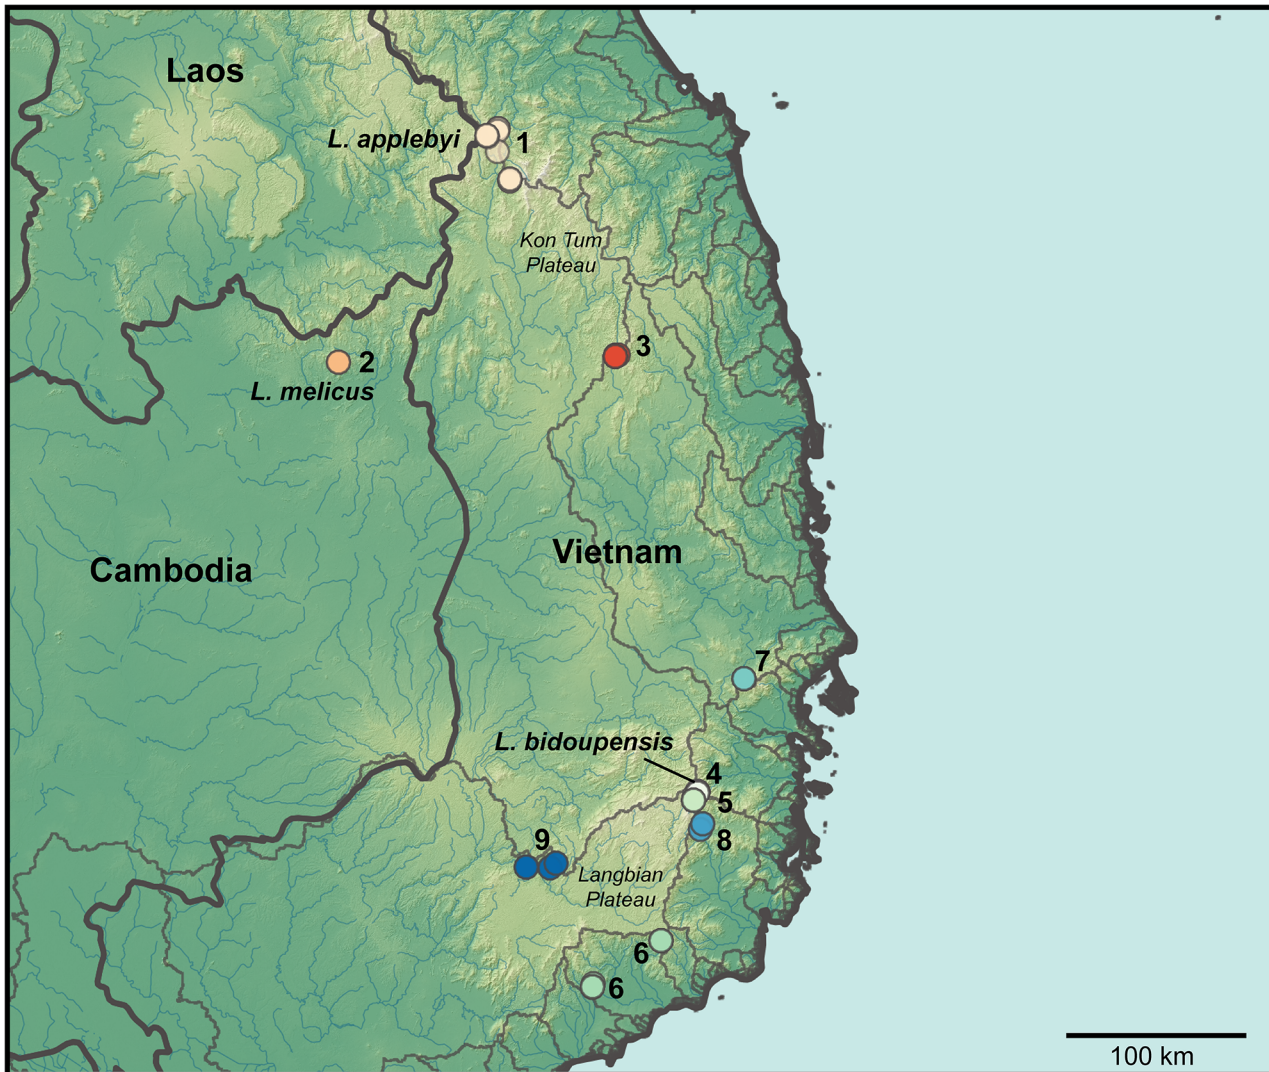

**Fig 1. Map showing the localities where specimens in the *Leptotalax applebyi* group were collected.** Colours of localities assigned based on the nine molecular lineages. Paler areas are higher elevation. Dark grey lines show country boundaries, pale grey lines show watershed boundaries and blue lines show rivers.

doi:10.1371/journal.pone.0128382.g001

associated with (J. Rowley, pers. obs.). Given their likely limited dispersal potential due to their small size and highly localized breeding habitat, low detectability, and complex topography within their range, it is likely the *L. applebyi* group contains undiagnosed species diversity.

This study surveyed additional areas of the Central Highlands of Vietnam and northeastern Cambodia and identified a number of new populations of frogs assignable to the *L. applebyi* group. Specimens, tissue samples and advertisement calls were sampled from all new populations to aid in identifying undiagnosed diversity. Advertisement calls have been particularly important in delineating species boundaries in the genus (e.g. [29–31]), and more broadly have been shown to serve as premating species isolating mechanisms, even when the morphologies of the frogs are indistinguishable (e.g. [33]). Additionally, we used these new localities in ecological niche modelling (e.g. [34]) in order to predict the geographic distribution of the group, and estimate historical habitat loss and current degree of habitat protection for the *L. applebyi* group.

## Materials and Methods

### Ethics Statement

All voucher specimens were obtained under appropriate permits for each site. Protocols for collection of specimens by JR were approved by the approved by the Australian Museum Animal Ethics Committee (#09–01); voucher specimens were euthanized using benzocaine. None of the species collected for this study are listed as protected, threatened, or listed under the Convention on International Trade in Endangered Species of Wild Fauna and Flora—CITES ([www.cites.org](http://www.cites.org)).

The National Forestry Protection Department, Diep Thanh Phong and all at Quang Nam Forestry Protection Department gave permission for surveys in Quang Nam Province, Vietnam. Staff of Ngoc Linh Nature Reserve issued permissions (Permit numbers 776/BNN-KL, 748/BNNKL) and the People's Committee of Kon Tum Province issued permit number 548/UBND-DN for work in Kon Tum Province, Vietnam. H.E. Dr Mok Mareth, Senior Minister of Environment and H.E. Chay Samith, General Director of Administration for Nature Conservation and Protection permitted us to conduct surveys and issued specimen export permits (Permit # 405 DNCP MoE [transport]) in Modulhiri Province, Cambodia. The Vietnamese Ministry of Agriculture and Rural Development issued permission to collect (Permit number 3023/GT-BNN-KL & 1430/GT-BNN-KL) for Lam Dong Province, Vietnam. The Vietnamese Ministry of Agriculture and Rural Development (Permit number 779/TCLN-BTTN and Export Permit No. 11VN0003N/KL-NC) for work in Binh Thuan Province. Mr Nguyen Cong Van, Director of Phuoc Binh National Park permitted us to work in Ninh Thuan Province, Vietnam (University of Science Ho Chi Minh City document 425/KHTN-KH and 494/KHTN-KH).

### Surveys

*Leptotalax* specimens were collected between 2006 and 2011 from 22 sites (defined as localities >1 km apart) in eight provinces within in the Central Highlands of Vietnam and a single province in adjoining northeastern Cambodia. These localities fell within two distinct regions; central Vietnam and northeastern Cambodia (the Kon Tum Plateau), and southern Vietnam (the Langbian Plateau) ([Fig 1](#)). Sites fell within seven watershed basins and were all within broadleaf evergreen forest between 200–1935 m asl. Most frogs were encountered during nocturnal surveys at breeding sites, where the advertisement calls of males increased detectability. Geographic coordinates were obtained using a Garmin GPSMAP 60CSx GPS receiver and recorded in datum WGS 84.

A total of 87 adult male and 19 adult female specimens were collected. Prior to preservation, tissues (liver or thigh muscle) was removed for molecular analysis and stored in EDTA/DMSO or 80% ethanol. Specimens were then fixed in 10% formalin and then stored in 70% ethanol or fixed and stored in 80% ethanol. Specimens were deposited at the American Museum of Natural History (AMNH), Australian Museum (AMS), Institute of Ecology and Biological Resources (IEBR), Museum of Vertebrate Zoology, University of California Berkeley (MVZ), North Carolina Museum of Natural Sciences (NCSM), University of Science, Ho Chi Minh City (UNS), and Zoologisches Forschungsmuseum Alexander Koenig (ZMFK), ([S1 Table](#)). Type specimens of *Leptotalax applebyi*, *L. bidoupensis* and *L. melicus* were included in all morphometric, molecular and acoustic analyses.

### Molecular data

Genomic DNA was extracted from EDTA/DMSO or ethanol preserved tissues using DNeasy Blood and tissue kit (QIAGEN GmbH, Hilden, Germany), using the protocols for purification

of total DNA from animal tissues. Two mitochondrial (mtDNA) and three nuclear DNA (nuDNA) regions were amplified for this study. The two mtDNA regions were 16S, using the primers (5'-3') 16AR CGCCTGTTTATCAAAAACAT and 16AB CCGGTCTGAACTCAGATCACGT [35] and Cytochrome *b*, using the primers L14841 AAAAAGCTTCCATCCAACA TCTCAGCATGATGAAA and H15149 AACTGCAGCCCCCAGAAATGATATTTGTCTCA [36]. The three nuDNA regions were; NTF3, using the primers NTF3F3 TCTTCCTTATC TTTGTGGCATCCACGCTA and NTF3\_R ACATTGRGAATTCCAGTGTTTGTGCGTCA [37], NCX, using the primers NCX\_1F ACAACAGTRAGRATATGGAA and NCX\_1R CCTTCTGTTTCRATGATCAT [38] and SLC8A3 using the primers SCF\_1F CCATAGARGTCAT AACATCACA and SCF\_1R TTCATRACYTTGCCRTCCAT [38].

PCR amplification was carried out in 25 µl reactions with 1000 ng of genomic DNA, 1 x Reaction Buffer (Bioline My Taq Red Reagent Buffer), 2 pmol corresponding primers and Bio-line My Taq Red DNA polymerase (0.5 unit). Negative controls were included in each PCR. Thermocycling was performed on an Eppendorf Mastercycler EpS (Eppendorf, Hamburg, Germany) under the following conditions: Cytochrome *b* and 16S initial denaturation 94°C (2 mins), 2 cycles of 94°C (20s) denaturation, 52°C (40s) annealing and 72°C (60s) extension, followed by 33 cycles of 94°C (20s) denaturation, 50°C (40s) annealing and 72°C (50s) extension, followed by a final extension step at 72°C for 5 mins. For NTF3 the following conditions were used; 94°C (5 mins), 35 cycles of 94°C (45s) denaturation, 60°C (30s) annealing and 72°C (60s) extension, with a final extension step at 72°C for 7 mins. For NCX and SLC8A3 the conditions were; 94°C (3 mins), 35 cycles of 94°C (60s) denaturation, 50°C (60s) annealing and 72°C (60s) extension, and a final extension step at 72°C for 3 mins. All PCR products were purified using Exo-Sap-IT (USB Corporation, OH, USA), and directly sequenced at the Australian Genome Research Facility (Sydney, Australia) and Macrogen (Seoul, Korea).

Sequences were edited with reference to chromatograms using Sequencher v. 4.10 (Gene Codes, Ann Arbor, MI, USA) and deposited in GenBank (accession # KR018001–KR018126; [S1 Table](#)). The data set was aligned using the ClustalW option in MEGA 5 [39].

Phylogenetic relationships among individuals were estimated using Bayesian Inference conducted in Mr Bayes version 3.1 [40]. An appropriate model of evolution was determined for each gene region using jModelTest version 1.1 [41, 42] and the Akaike Information Criterion (AIC). Analyses were conducted using default settings for priors, one for the concatenated nuDNA (unphased), partitioned by gene region, and the other for the concatenated mtDNA, partitioned by gene region. MCMC sampling was used to calculate posterior probability. Two independent analyses ran simultaneously with four chains per run (1 cold, 3 hot). The chains were run for 10,000,000 generations and sampled every 100 generations, generating 100,000 sampled trees. Individual gene trees were also generated using the above methods, with 100 000 generations run sampled every 100 generations. Tracer version 1.5 [43] was used to determine that chain convergence and adequate Effective Sample Size (>100) were obtained. Posterior probabilities (decimals) were used to assess the level of branch support. Values  $\geq 0.90$  were considered significant. *Leptolalax* species that are not considered part of the *L. applebyi* group (*Leptolalax aereus*, *L. bourreti*, and *L. firthi* [32]), along with closely related megophrid genera were used as outgroups (*Brachytarsophrys intermedia*, *Leptobranchium chapaense*, and *Oreolalax sterlingae*).

To resolve individual alleles at the nuclear loci NTF3, NCX and SLC8A3 for heterozygous individuals and investigate allele sharing, SeqPHASE [44] and PHASE [45] were used.

## Morphometric data

Morphometric data were taken from preserved specimens (to the nearest 0.1 mm) with digital callipers. We measured snout-vent length (SVL); head length from tip of snout to rear of jaws

(HDL); head width at the commissure of the jaws (HDW); snout length from tip of snout to the anterior corner of eye (SNT); diameter of the exposed portion of the eyeball (EYE); interorbital distance (IOD); horizontal diameter of tympanum (TMP); distance from anterior edge of tympanum to posterior corner of the eye (TEY); and tibia length with the hindlimb flexed (TIB), manus length from tip of third digit to base of inner palmar tubercle (ML), pes length from tip of fourth toe to base of the inner metatarsal tubercle (PL), maximum diameter of pectoral gland (PEC), maximum diameter of femoral gland (FEM), and maximum diameter of humeral gland (HUM). Sex was determined by direct observation of calling in life, the presence of internal vocal sac openings and/or gonadal inspection. See [S2 Table](#) for Museum registration numbers of specimens examined.

We performed Principal Component Analyses (PCA) based on original morphometric values for males, using varimax rotation. Due to the poor preservation of a number of specimens, we removed ML and PL from the analysis. To determine morphometric differences among molecular lineages, we examined each variable that contributed highly to the factor loadings ( $>0.80$ ), removing the effect of SVL from all other variables. For variables with a normal distribution, we performed ANCOVA analyses, with SVL used as covariable, followed by Tukey HSD Post-Hoc tests for pairwise comparisons among the nine lineages identified molecularly. For non-normal variables, we removed the effect of SVL calculating ratios of the variable relative to SVL and performing nonparametric Wilcoxon/Kruskal-Wallis tests and Nonparametric Comparisons for each pair using the Wilcoxon Method. Statistical analyses were performed by using JMP software (ver. 10.0.2; SAS Institute Inc. Cary, NC, USA).

### Acoustic data

The use of bioacoustic data is useful in species delineation in anurans, as sexual selection may lead to the rapid divergence of advertisement calls, thereby generating prezygotic reproductive barriers [46–47]. We recorded the advertisement calls of individuals in the *L. applebyi* group with an Edirol R-09 WAVE/MP3 Recorder or a Zoom H4n Handy Mobile 4-Track recorder (44.1 kHz sampling rate, 24-bit encoding) and Røde NTG-2 condenser shotgun microphone. Calls were recorded at a distance of approximately 0.1–0.3 m and ambient temperatures were taken immediately after recordings using a Kestrel 3500 or 4000 hand-held weather meter.

Calls were analysed with Raven Pro 1.3 software (<http://www.birds.cornell.edu/raven>). Audiospectrograms in figures were calculated with fast-Fourier transform (FFT) of 1024 points, 50% overlap and 172 Hz grid-spacing, using Hanning windows. Comparisons of anuran advertisement calls in general are complicated by inconsistent use of terms and a lack of clear definitions in terminology. Here we use the definitions of Duellman [48], except that we define a single call as vocalisations produced during a single expiration [49]. Temporal and spectral parameters of calls were measured using the definitions of Cocroft & Ryan [50], except for fundamental frequency, where the definition of Duellman [48] was used. For each call recording, we measured the call duration (ms), intercall interval (ms), number of notes per call, internote interval (ms), percent of call composed of note 1, number of pulses per note and dominant frequency (kHz). We consider that structural differences (pulsed versus non pulsed, non-overlap in notes/call, number of pulses) in the advertisement calls indicative of prezygotic reproductive barriers (e.g. [51]).

### Ecological Niche Modelling

We modelled the potential distribution of the *Leptolalax applebyi* group using the R software toolkit, version 2.15.3 (R Core Team, 2013) and the “raster” (version 2.2–31) and “dismo” (version 0.9–3) packages. The latter was interfaced to version 3.3.3k of the MaxEnt program, a

machine-learning algorithm that generates a cumulative probability distribution based on the principle of maximum entropy [52, 53]. The resulting output is an indicator of environmental suitability for the species, ranging from 0 (unsuitable) to 1 (optimal). DOMAIN [54], BIOCLIM [55], and generalized linear modelling methods were also used for comparison but resulted in lower AUC scores, consistent with previous studies [56, 57]

We used current climatic data from the WorldClim database (30-second grid; [58]). We defined our study area as a region 6° on each side containing our survey sites, from 104–110°E and 10–16°N. To account for correlations among the data, we performed a principal components analysis on the 19 WorldClim “bioclimatic variables” for all 518,400 grid cells in the study area. The first eight principal components were used, which together accounted for 99.98% of the variance in the data. Due to the association of species with streams in sloping terrain, we supplemented these eight climatic principal components with the slope of terrain, calculated from the WorldClim elevation data using the “terrain” function in R. The 1<sup>st</sup>, 3<sup>rd</sup>, and 6<sup>th</sup> bioclimatic principal components, together with the slope, were most influential in the MaxEnt model. These three bioclimatic principal components loaded primarily on annual and wettest-quarter precipitation; on warmest-quarter vs wettest-quarter precipitation; and on a combination of eight temperature-related variables.

Occurrence records clustered into a northern (lineages 1–3) and southern (lineages 4–9) group. These clusters correspond to biogeographically distinct plateaus (e.g. average annual rainfall 2151–3032 mm at the northern sites compared to 1292–2119 mm at southern sites), separated by low-elevation terrain. To account for the heterogeneity in climatic niches, we carried out ecological niche modelling separately for each geographic clusters identified, and then combined results (following a similar method to [59]). The predicted range for the *Leptotalax applebyi* group was the union of the two predicted cluster ranges. The 106 specimens from the *Leptotalax applebyi* group were found at 11 distinct northern sites, and 20 distinct southern sites, so that ecological niche modeling was performed using 11 and 20 “presence” datapoints respectively. MaxEnt modeling performs acceptably well with as few as 5–10 datapoints [60, 61].

As usual [62], the species “presence” data in each case was supplemented with 1,000 randomly chosen “background” datapoints. We chose these to be at least 5 km from “presence” sites. As for the “presence” data, the values of the terrain slope and the eight climatic principal components at these datapoints was used. Model evaluation was conducted using a “leave out one third” process, in which two thirds of the “presence” data (randomly chosen) was used to train the model, and one third (together with 1,000 new “background” points) was used to test the model. This was performed 50 times, and median results chosen. The fit of models to the test data was evaluated using the test data sets by calculating the median area under the Receiver Operating Characteristic curve, or AUC [63]. On average, random guessing gives an AUC of 0.5, and a perfect model has an AUC of 1.0. Models with good predictive ability are generally accepted as having AUC scores >0.75 [64], and those with high accuracy scores of >0.9 [65]. The median value of the maximum of the sum of the sensitivity (true positive rate) and specificity (true negative rate) was used as a threshold for the suitability values calculated by MaxEnt. This thresholding technique generally works well, giving a balance between false positives and false negatives [66]. The two resulting distribution regions were then merged to give a predicted suitable range for the *L. applebyi* group.

In order to consider the effect of habitat loss on the geographic range of the species group, we obtained areas of Broadleaf Evergreen Forest, the forest type observed at all localities, from the GLCNMO Global Land Cover Map (derived from 2008 MODIS satellite imagery; [67]). Protected area boundaries were obtained from the World Database on Protected Areas

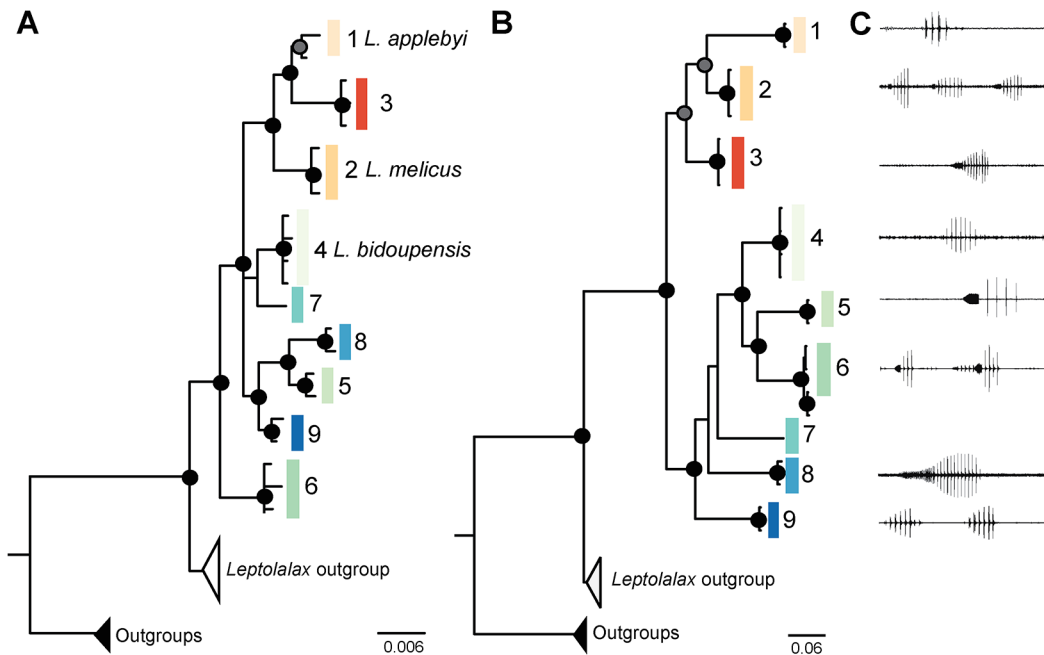

**Fig 2. Bayesian inference (BI) trees based on (A) 1542 bp of nuclear gene sequences and (B) ~868 bp of mitochondrial gene sequences for *Leptotalax applebyi* group and outgroups.** Node support is indicated by circles; those with Bayesian posterior probabilities of 0.95–0.99 are grey and 1.00 are black. (C) Two second waveforms of relative amplitude over time for representative advertisement calls for mitochondrial lineages 1–6 and 8–9.

doi:10.1371/journal.pone.0128382.g002

(WPDA; [68]). Watershed boundaries were obtained from HydroSHEDS digital river database (30-second resolution; [69]).

Our sample size for each molecular lineage was too small to assess bioclimatic-niche space overlap in the *Leptotalax applebyi* group, (eg. [70, 71]), but possible separation of the identified molecular lineages in bioclimatic space was examined by plotting each of the 31 sites according to elevation (m), temperature seasonality, annual precipitation and precipitation seasonality (the latter three as extracted for each site from WorldClim “bioclimatic variables” [58]), factors known to strongly influence bioclimatic-niche divergence among species [70–72].

## Results

We collected a total of 106 specimens in the *Leptotalax applebyi* group, 87 adult males and 19 adult females, performed molecular analysis on 23 individuals from all main geographic areas, and analyzed the advertisement calls of 25 individuals from all but one main geographic area.

### Molecular

~868 bp of mtDNA and 1542 bp of nuDNA were obtained from 29 individuals (23 *L. applebyi* group, 3 *Leptotalax* species outside the *L. applebyi* group and 3 outgroups). When analyzed separately slightly different tree topologies were resolved from each gene region, however analysis of the concatenated mtDNA and nuDNA data resolved similar tree topologies, with nine distinct lineages identified in both data sets (Fig 2). No haplotypes were shared between individuals of different mtDNA lineages, and when the nuDNA was phased there were only two instances of individuals of different lineages sharing nuclear alleles (lineages 4 and 7 and lineages 9 and 5 in the NCX gene). Three of the molecular lineages identified corresponded with described species; lineage 1 (*L. applebyi*), lineage 2 (*L. melicus*), and lineage 4 (*L. bidoupensis*).



Overall, the concatenated data set grouped the nine lineages into two larger lineages corresponding to geographic regions (a northern group centered on the Kon Tum Plateau and a southern group on the Langbian Plateau). The northern geographic lineages comprised lineages 1–3 (including *L. applebyi*, *L. melicus* and specimens from Gia Lai Province), whereas the southern cluster comprised lineages 4–9 (*L. bidouppensis* and remaining specimens from the Langbian Plateau).

The genetic differentiation within the group appears related to watershed basins, with lineages restricted to specific watershed basins or portions of specific watershed basins. While lineages 1, 4, and 9 appear to straddle watershed boundaries, lineages 2, 6 and 8 appear to be restricted to specific basins, and lineages 3 and 7 appear to be restricted to the northern and southern portions of a larger basin (Fig 1).

The percent uncorrected pairwise divergence at the 16S rRNA mitochondrial gene fragment examined ranged from 4.48–11.21% among lineages and 0.00–0.56% within lineages. Although we did not sample extensively within each watershed basin (i.e. many lineages were sampled from only a few nearby sites), there was evidence that divergence was related to barriers such as mountain ranges, rather than simply geographic distance. Specimens within lineage 6 came from over 43 km apart in the same drainage basin yet displayed only minor divergence at the 16S rRNA gene fragment (0.56%), while *L. bidouppensis* and lineage 5 displayed relatively high divergence (4.68%) despite being geographically separated by only 5 km.

## Morphometrics

Frogs were morphologically similar, all with a brown dorsum, dark lateral blotches and a dark supratympanic fold (Fig 3). Adult males ranged from 18.5–30.6 mm SVL and females from 21.7–32.1 mm. Principal component analyses (PCA) of our measurements for males reveal that the majority of the variance (60.1%) was explained by the first factor. This factor had high loadings for SVL, HDW, SNT, IOD, TMP, and TIB, suggesting that it is strongly influenced by body size (S4 Table). Factor 2, which is mostly influenced by PEC, explains 9.6% of the variance. Scatterplots of Factor 1 vs. Factor 2 shows separation between some of the lineages, especially *L. applebyi* (lineage 1) and other species (Fig 4A).

In order to translate these data into more diagnostically relevant information, we performed univariate analyses of those variables that were identified as most relevant by PCA (SVL, HDW, IOD, TMP, TIB and PEC). Only SVL (ANOVA;  $F = 36.0$ ,  $p < 0.001$ ), HDW (ANCOVA,  $F = 69.6$ ,  $p = 0.0026$ ), TIB/SVL (non-normal, Wilcoxon,  $\chi^2 = 37.2$ ,  $p < 0.001$ ) and PEC/SVL (non-normal, Wilcoxon,  $\chi^2 = 21.9$ ,  $p < 0.0051$ ) varied significantly among lineages. The most obvious difference between lineages was body size (Fig 4B), and almost all lineages can be differentiated morphologically from each other by a combination of SVL, HDW, TIB/SVL and PEC/SVL (Fig 4; Table 1). The two lineages geographically closest to each other (~5km), *L. bidouppensis* and Lineage 5, were clearly distinguished morphometrically, and all but Lineage 8 was morphometrically distinguishable from members of its geographically closest lineage (Table 1).

## Acoustics

We obtained call recordings from 25 individuals representing all molecular lineages with the exception of lineage 7 (S3 Table). Calls were recorded at 12.9–26.4°C. Analysis was complicated by the relatively low number of individuals recorded, uneven sample size per lineage and the correlation of spectral and temporal call parameters to body size and temperature. Mean dominant frequency (kHz) was correlated with SVL (mm) ( $R^2 = 62.1\%$ ,  $F = 27.91$ ,  $p < 0.001$ ), and mean internote interval (ms), mean note repetition rate (notes/s) and mean relative duration of

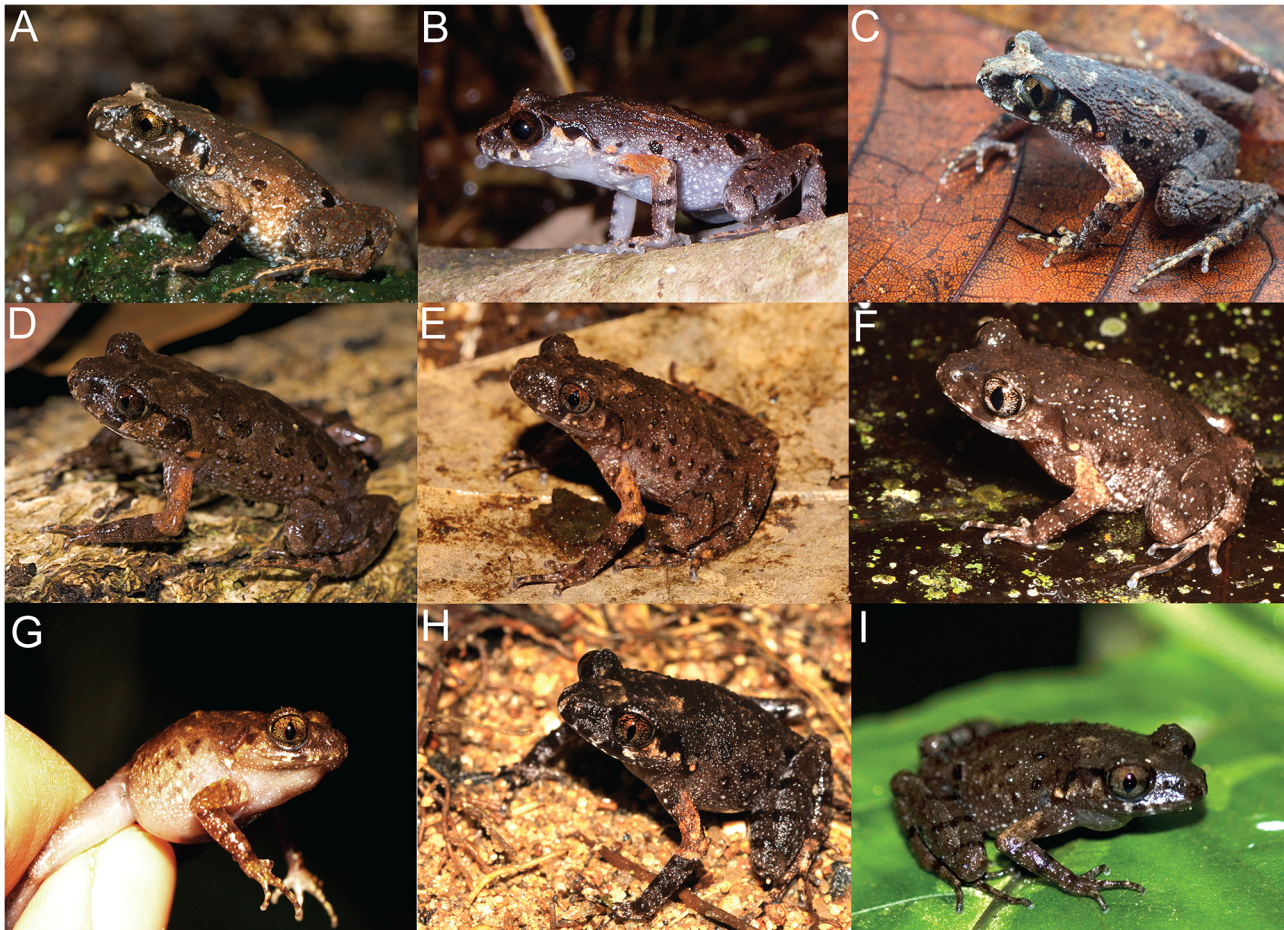

**Fig 3. Images in life of frogs in the *Leptolalax applebyi* group.** (A) *Leptolalax applebyi* (= molecular lineage 1; Kon Tum Province, Vietnam), (B) *Leptolalax melicus* (= molecular lineage 2; Ratanikiri Province, Cambodia), (C) *Leptolalax* sp. (= molecular lineage 3; Gia Lai Province, Vietnam), (D) *L. bidoupensis* (= molecular lineage 4; Lam Dong Province, Vietnam), (E) *Leptolalax* sp. (= molecular lineage 5; Lam Dong Province, Vietnam), (F) *Leptolalax* sp. (= molecular lineage 6; Binh Thuan Province; photo: Pedro Peloso), (G) *Leptolalax* sp. (= molecular lineage 7; Dak Lak Province, Vietnam), (H) *Leptolalax* sp. (= molecular lineage 8; Ninh Thuan Province, Vietnam), (I) *Leptolalax* sp. (= molecular lineage 9; Dak Nong Province, Vietnam).

doi:10.1371/journal.pone.0128382.g003

note 1 (%) were correlated with temperature ( $R^2 = 39.3\%$ ,  $F = 14.89$   $p = 0.0008$ ;  $R^2 = 34.2\%$ ,  $F = 11.93$ ,  $p = 0.0022$ ;  $R^2 = 32.7\%$ ,  $F = 11.17$ ,  $p = 0.0028$ ).

Call structure varied considerably, with the advertisement calls of the lineages differing in terms of number of notes, the presence, duration and number of pulses in an introductory note, and pulse number in non-introductory notes (Figs 2 and 5).

### Ecological Niche Modelling

A large area of southern and central Vietnam and eastern Cambodia was predicted to be climatically suitable for the *L. applebyi* group (Fig 6A). The median AUC scores were 0.990 for the northern region (Fig 6A) and 0.983 for the southern region (Fig 6B). Modelling only a single region resulted in a lower AUC score of 0.957, supporting the decision to model the northern and southern regions separately.

Calculated thresholds were 0.333 for the northern region and 0.144 for the southern region. The lower, less conservative, value for the southern region is the result of reduced uncertainty due to the greater number of records for that area. When thresholds were applied, the total

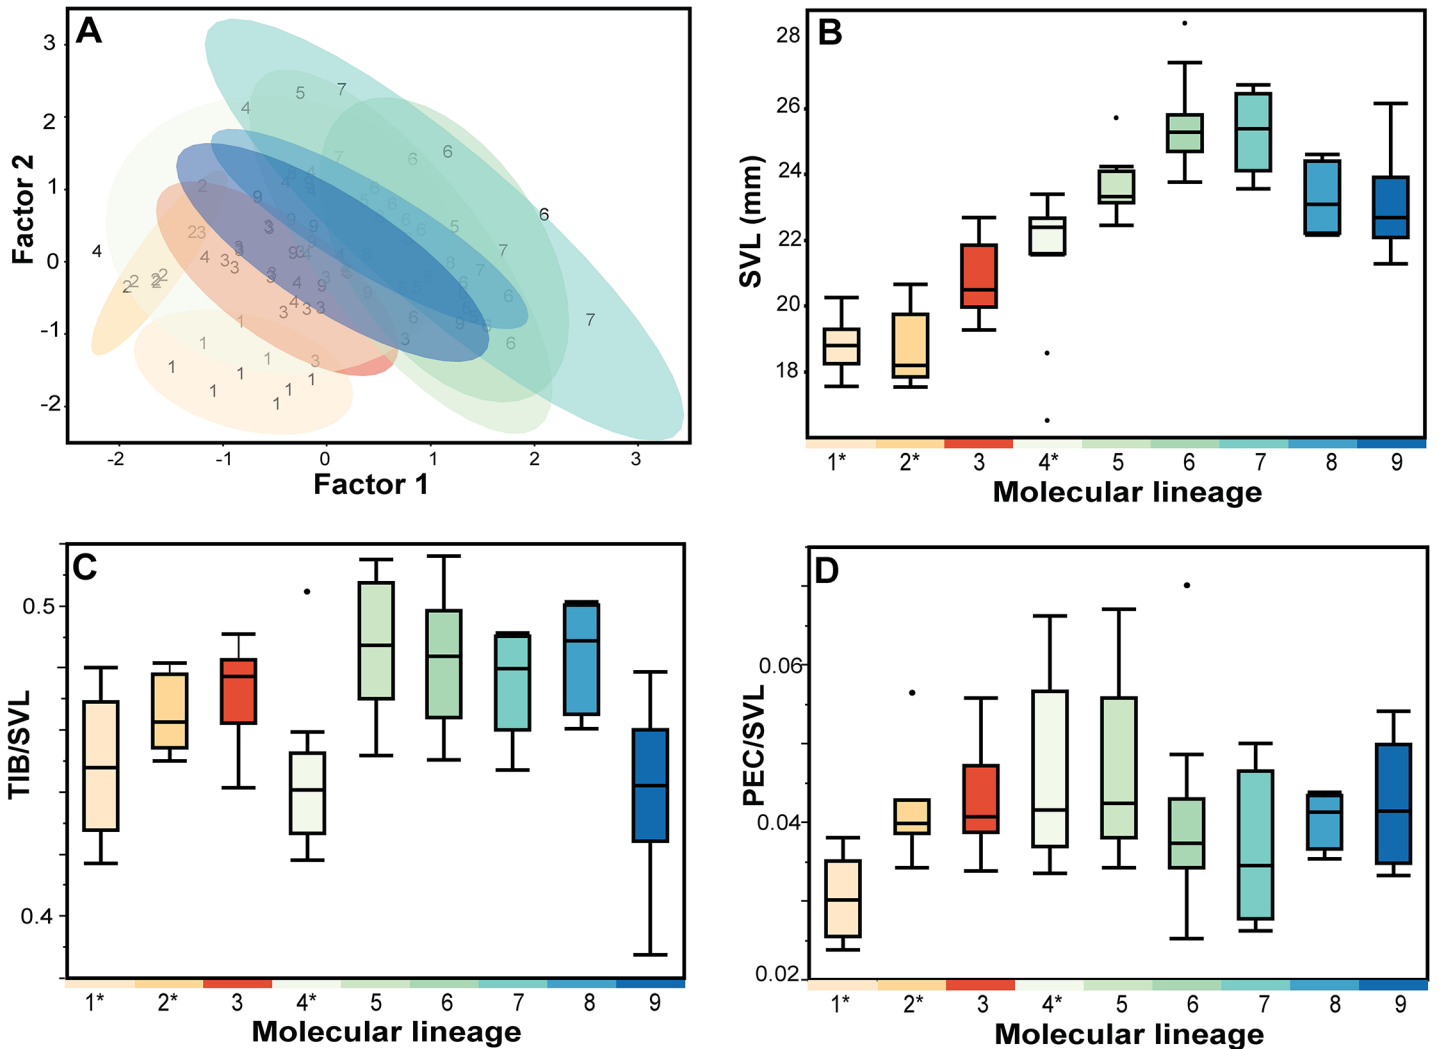

**Fig 4. Morphometric differentiation among adult male frogs in each of the nine molecular lineages identified in *Leptolalax applebyi* group.** (A) Scatterplots of the first two factors of Principal Component Analysis of male morphometrics. Points are numbered and 95% confidence ellipsoid coloured according to molecular lineages. Boxplots of (B) SVL, (C) relative tibia length (TIB/SVL) and (D) relative pectoral gland size (PEC/SVL) of adult males in each molecular lineage. For all boxplots, horizontal lines within each box represent the median and boxes encompass the 75th and 25th quartiles. Currently recognized species are marked with an asterisk (1 = *L. applebyi*, 2 = *L. melicus*, 4 = *L. bidoupensis*).

doi:10.1371/journal.pone.0128382.g004

area predicted to be climatically suitable for *L. applebyi* group species was 30,011 km<sup>2</sup>, centering on the Kon Tum Plateau, northeastern Cambodia and central Vietnam, and the Langbian Plateau, southern Vietnam (Fig 6D). 55.3% of this climatically suitable area was covered by Broadleaf Evergreen Forest in 2008 (Fig 6E), but only 22.4% of the climatically suitable area (29.3% of the portion covered by Broadleaf Evergreen Forest) currently falls within protected areas (Fig 6F).

In addition to the drainage basins where we detected frogs in the *L. applebyi* group, there are seven additional watershed basins (labelled i–vii in Fig 6) which each contained over 100 km<sup>2</sup> predicted to be climatically suitable for the species group. The climatically suitable area of Broadleaf Evergreen forest in these watershed basins ranges from 163 km<sup>2</sup> (basin ii in Fig 6) to 418 km<sup>2</sup> (basin vii in Fig 6). However, only basins i and vi have large areas of this forest falling within protected areas (58% and 26% of the climatically suitable forested area

**Table 1. Summary of morphological comparisons among males from each molecularly identified lineage of the *Leptolalax applebyi* group.**

|                                      | Lineage 1 ( <i>L. applebyi</i> ) | Lineage 2 ( <i>L. melicus</i> ) | Lineage 3 | Lineage 4 ( <i>L. bidoupsensis</i> ) | Lineage 5 | Lineage 6 | Lineage 7 | Lineage 8 | Lineage 9 |
|--------------------------------------|----------------------------------|---------------------------------|-----------|--------------------------------------|-----------|-----------|-----------|-----------|-----------|
| Lineage 1 ( <i>L. applebyi</i> )     |                                  |                                 |           |                                      |           |           |           |           |           |
| Lineage 2 ( <i>L. melicus</i> )      | PEC                              |                                 |           |                                      |           |           |           |           |           |
| Lineage 3                            | SVL, TIB, PEC                    | SVL                             |           |                                      |           |           |           |           |           |
| Lineage 4 ( <i>L. bidoupsensis</i> ) | SVL, HDW, PEC                    | SVL, TIB                        | TIB       |                                      |           |           |           |           |           |
| Lineage 5                            | SVL, HDW, TIB, PEC               | SVL, TIB                        | SVL       | SVL, TIB                             |           |           |           |           |           |
| Lineage 6                            | SVL, TIB, PEC                    | SVL, TIB                        | SVL       | SVL, TIB                             | SVL       |           |           |           |           |
| Lineage 7                            | SVL                              | SVL                             | SVL       | SVL, TIB                             |           |           |           |           |           |
| Lineage 8                            | SVL, HDW, PEC                    | SVL                             | SVL       | TIB                                  |           |           |           |           |           |
| Lineage 9                            | SVL, PEC                         | SVL, TIB                        | SVL, TIB  |                                      | TIB       | SVL, TIB  | SVL, TIB  | TIB       |           |

Morphometric variables that differed significantly between species. SVL was compared without covariate. To remove the effects of SVL on other variables, we used ANCOVAs with SVL used as covariable and Tukey’s HSD Post-Hoc analyses. For non-normal variables, we analysed ratios relative to SVL (TIB/SVL and PEC/SVL) using Wilcoxon/Kruskal-Wallis tests and Nonparametric Comparisons using the Wilcoxon Method. See [methods](#) for abbreviations.

doi:10.1371/journal.pone.0128382.t001

respectively). There is 1% or less suitable Broadleaf Evergreen Forest within protected areas in the other five basins.

The 31 sites at which frogs in the *L. applebyi* group were collected varied in terms of elevation above sea level (m), temperature seasonality, annual precipitation (mm), and precipitation seasonality (Fig 7). In particular, the northern lineages (*L. applebyi*, *L. melicus* and lineage 3) appear to have overall greater temperature seasonality, annual precipitation and precipitation seasonality than the southern lineages (*L. bidoupsensis* and lineages 5–9; Fig 7).

## Discussion

This study provides evidence of a significant underestimation of diversity in the *Leptolalax applebyi* group of the Central Highlands in Vietnam and northeastern Cambodia. Using a combination of molecular, morphometric, and acoustic data, we conclude that at least two-thirds of the diversity of the group remains hidden within morphologically cryptic lineages. In addition to the three known species, our study identified six well-differentiated lineages on the basis of concordant mtDNA and nuDNA data. Overall, we obtained well-resolved genetic diversification among all lineages identified, with generally concordant mtDNA and nuDNA data. The only evidence of incomplete lineage sorting was in one of the more slowly evolving nuclear genes (NCX), which is typical of recently diversified species [73–75]. The percent uncorrected pairwise divergence at the 16S rRNA mitochondrial gene fragment examined ranged from 4.48–11.21%, and although variable, uncorrected pairwise divergences of 3–5% at the 16S rRNA gene are usually representative of differentiation at the species level in amphibians [76]. Those species most similar in external morphology, such as lineages 6 and 8, and *L. bidoupsensis* and lineage 9, were not resolved sister species in the molecular phylogenies, further supporting their validity as separate evolutionary lineages and candidate species worthy of further investigation. We refrain from formally delineating and describing these lineages as distinct species here, as the clarification of the taxonomic status of the lineages requires thorough integrative revision.

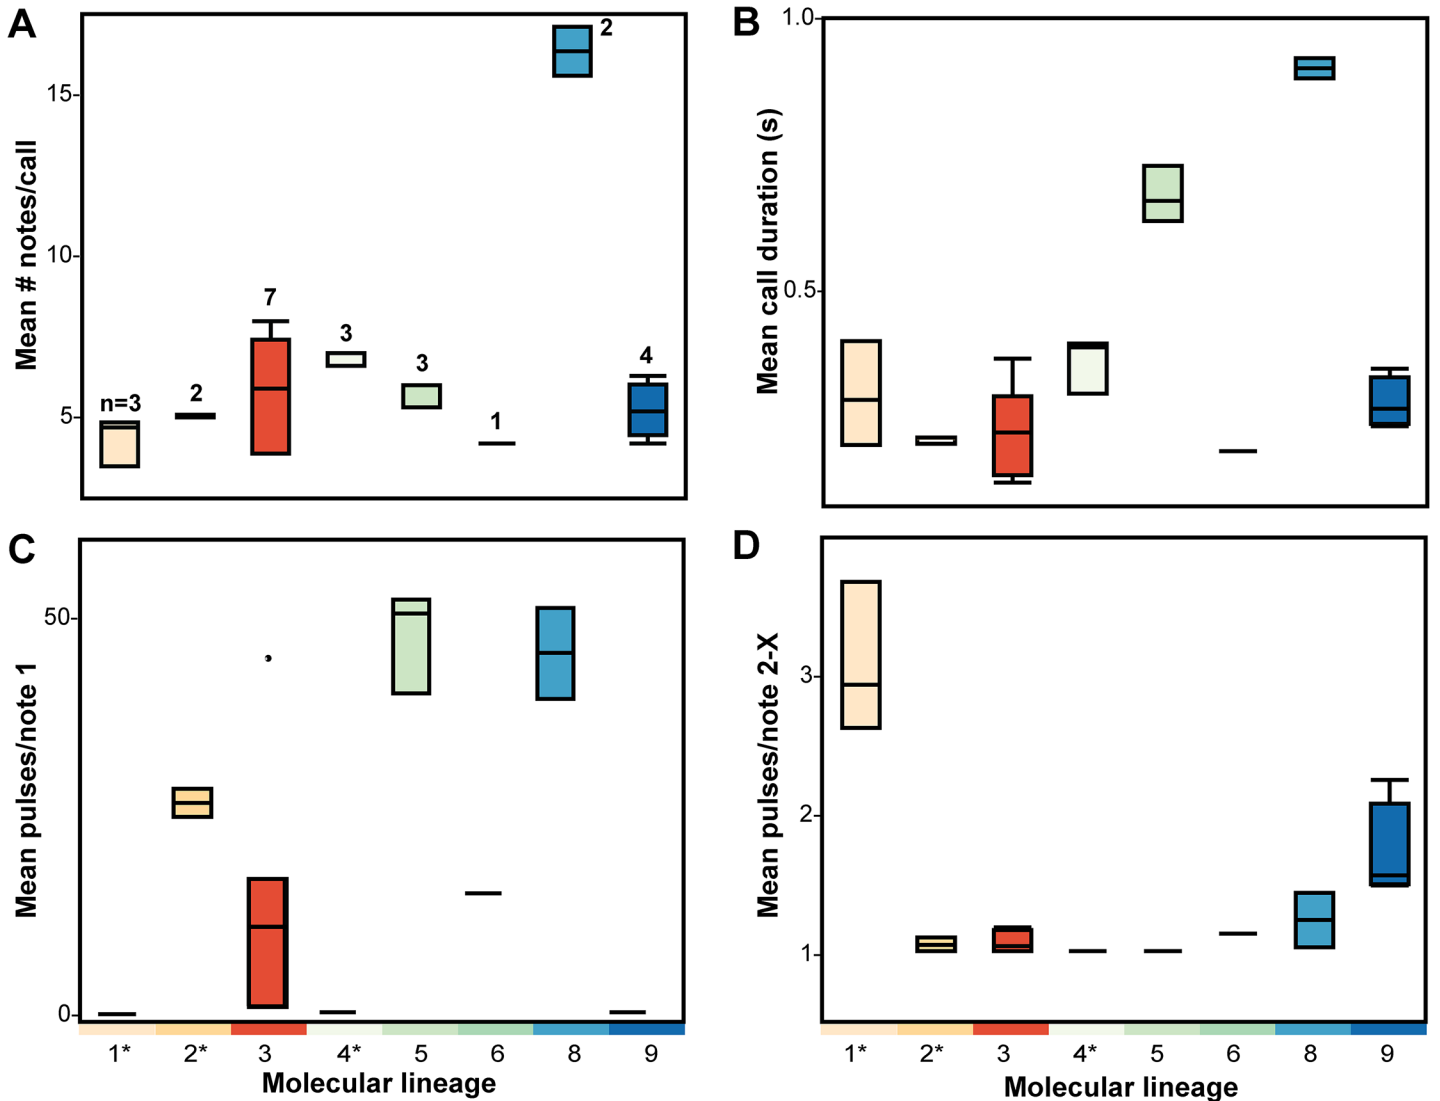

**Fig 5. Boxplots of (A) mean number of notes per advertisement call, (B) mean call duration, (C) mean pulses in note 1 and (D) mean pulses in notes 2–X in frogs in each of the nine molecular lineages identified in *Leptotalax applebyi* group.** Currently recognized species are marked with an asterisk (1 = *L. applebyi*, 2 = *L. melicus*, 4 = *L. bidoupensis*). Vertical lines within each box represent the median and boxes encompass the 75th and 25th quartiles. Sample size varied each molecular lineage and is displayed on panel A. Measured variables did not vary significantly with SVL (mm) or temperature (°C).

doi:10.1371/journal.pone.0128382.g005

It is likely that diversification within the species group and apparent microendemism has been driven by the low vagility of the species group and specific habitat requirements. Mountain ridges and valleys appear to present barriers to dispersal for the frogs, with several lineages apparently restricted to specific basins, and another restricted to the northern and southern portions of a larger basin, separated by a valley. Amphibians are poor dispersers in general [77], and adults of frogs in the *L. applebyi* group are an order of magnitude smaller than most other *Leptotalax* species. Small-bodied frogs tend to move smaller distances than large-bodied frogs [78], and in general, small body size in animals, including frogs, is correlated with range size [79, 80]. Smaller amphibians also lose water at a higher rate than larger amphibians (e.g. [81]). This physiological constraint may make them less likely to successfully traverse over the more exposed mountain ridges. Dispersal events during the larval stage are also likely to be

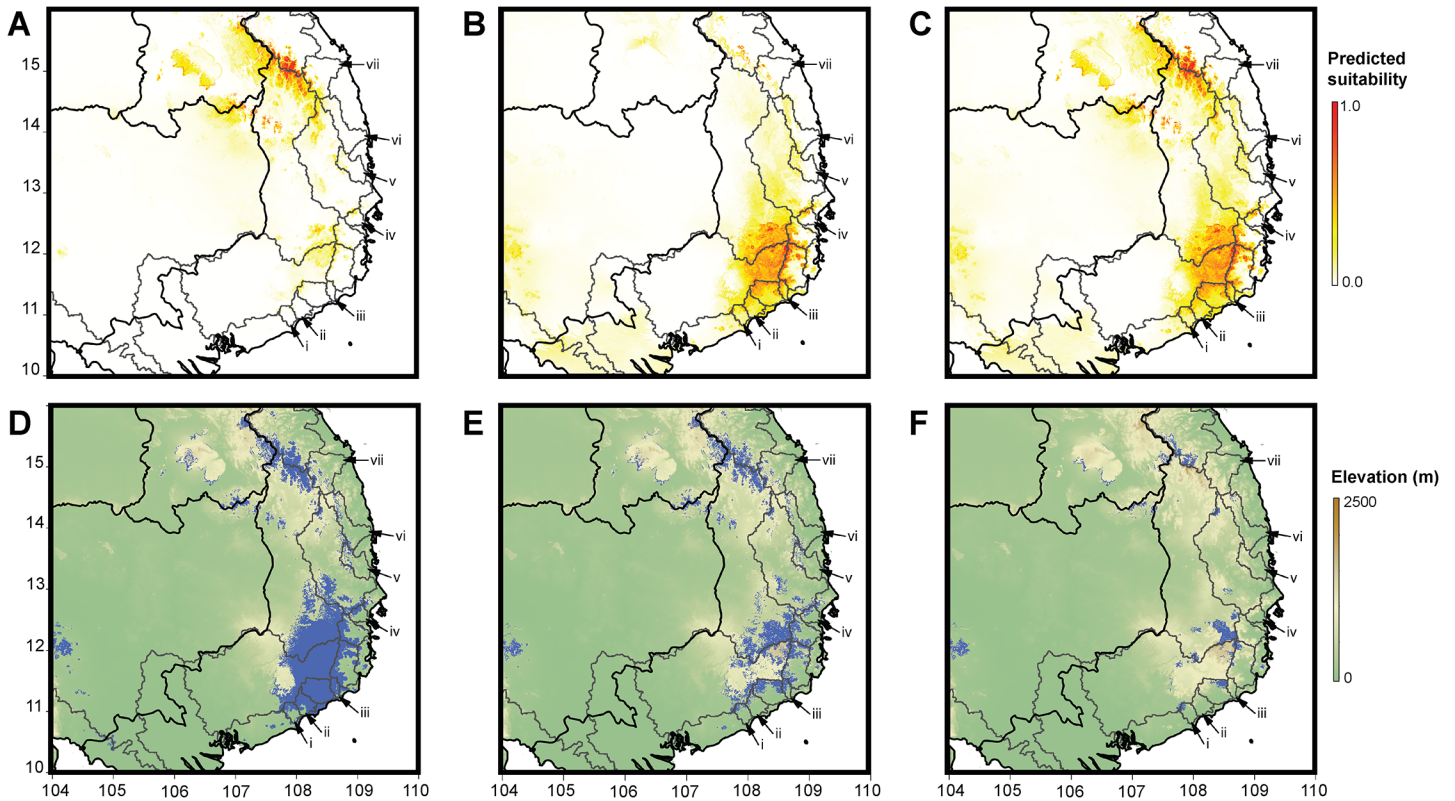

**Fig 6. Ecological niche suitability for frogs in the *Leptotalax applebyi* group (A) MaxEnt ecological niche suitability for frogs in the *Leptotalax applebyi* group of the northern region.** Grey lines outline the seven drainage basins in which frogs were observed, together with seven additional drainage basins containing areas climatically suitable for the group, marked i–vii. (B) MaxEnt ecological niche suitability for the southern region. (C) Merged MaxEnt ecological niche suitability, based on the maximum of A and B. (D) Area predicted to be climatically suitable for the *L. applebyi* group, based on thresholding at 0.333 for the northern region A and 0.144 for the southern region B, and then merging areas. (E) Portion of the area predicted to be climatically suitable for the *L. applebyi* group that was covered by Broadleaf Evergreen Forest in 2008 (55.3%). (F) Portion of area predicted to be climatically suitable for the *L. applebyi* group and covered by Broadleaf Evergreen Forest in 2008 and that currently falls within protected areas (29.3%)

doi:10.1371/journal.pone.0128382.g006

limited. Although tadpoles are not yet known, frogs in this group have been observed calling from seeps and soaks at the headwaters of small streams, and not the larger streams that most *Leptotalax* in the region breed in.

The relative morphological stasis in the group is likely to have been driven by the use of non-morphological species recognition and mate selection. We found evidence of considerable variation in the structure of advertisement calls within the group, with the number of notes, the presence, duration and number of pulses in an introductory note, and pulse number in non-introductory notes differing among lineages. Such differences in advertisement calls are often taken as evidence of prezygotic reproductive barriers [51, 82–84]. Although our sample sizes were small and comparisons were complicated by the effect of body size and temperature, our acoustic data corroborates molecular patterns. Existing morphotypes may have also been favored by the relatively stable environmental conditions such as those encountered in the leaf-litter in evergreen forests [9, 85].

We predict that the *Leptotalax applebyi* group is likely to have historically occurred over a large area (~30,000 km<sup>2</sup>), centering on the Central Highlands, particularly the Kon Tum Plateau, northeastern Cambodia and central Vietnam, and the Langbian Plateau, southern Vietnam. Originally almost completely forested [86], evergreen forest is likely to have covered a much larger area historically, and it is apparent that a considerable portion of the range of the

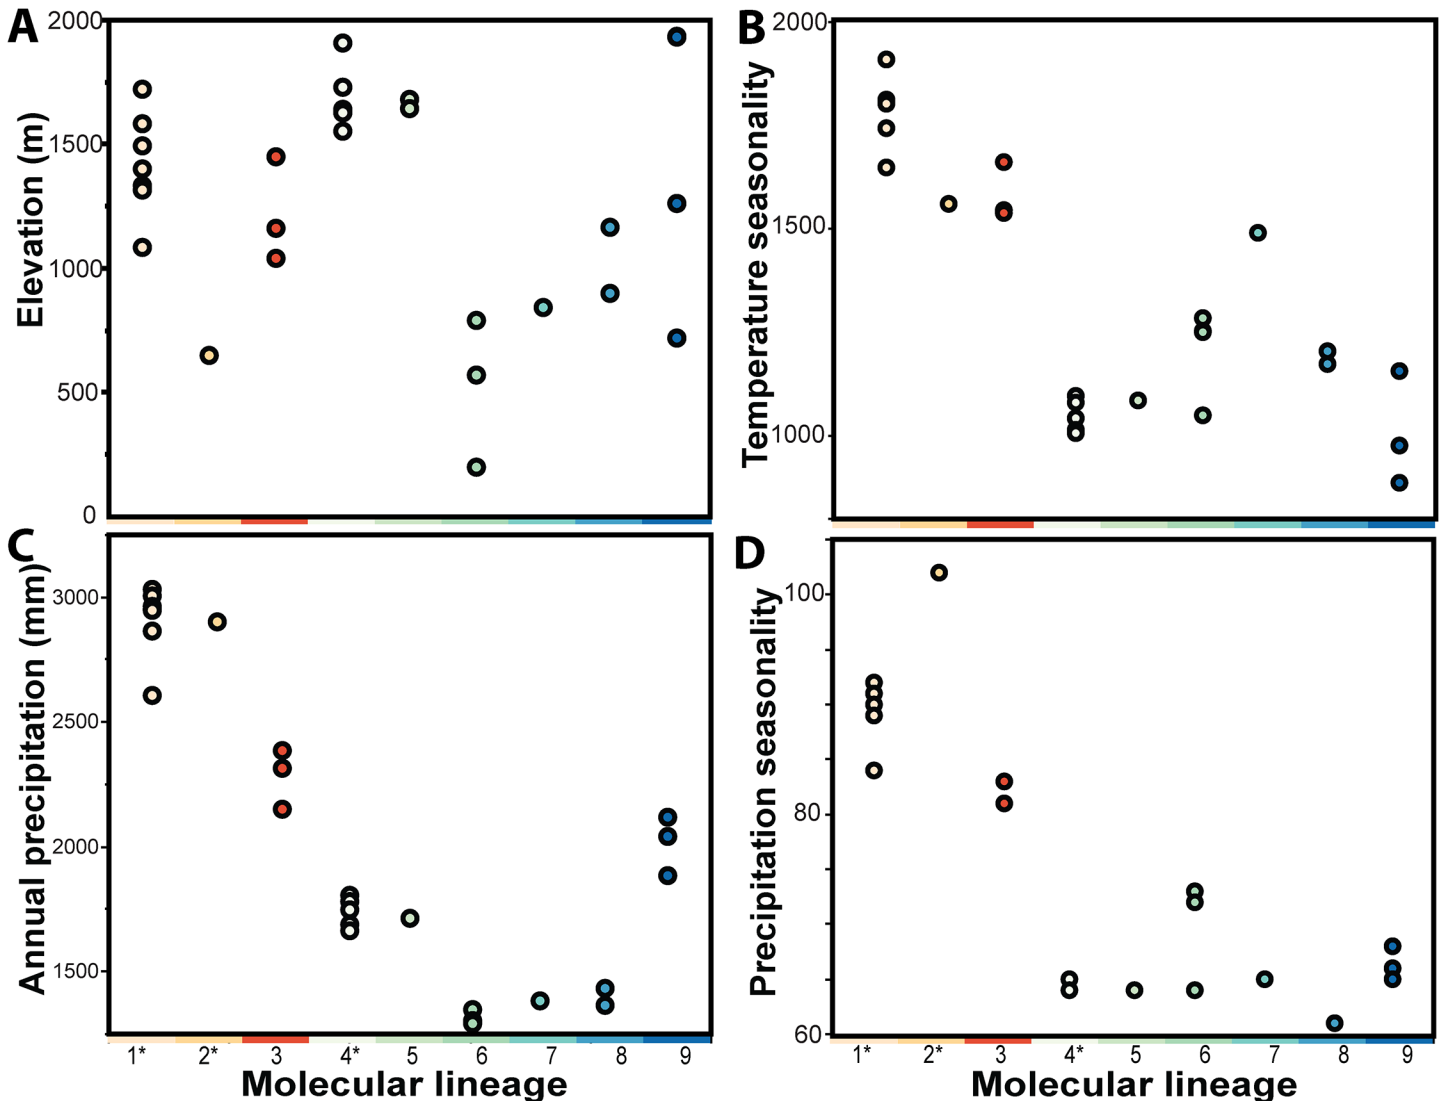

**Fig 7. Bioclimatic variables at collection localities for frogs in each of the nine molecular lineages identified in *Leptotalax applebyi* group.** (A) elevation above sea level (m), (B) temperature seasonality, (C) annual precipitation (mm), (D) precipitation seasonality. Currently recognized species are marked with an asterisk (1 = *L. applebyi*, 2 = *L. melicus*, 4 = *L. bidoupensis*).

doi:10.1371/journal.pone.0128382.g007

group has already been lost due to deforestation. Active deforestation is still occurring in the Central Highlands [87], with forest being converted into agricultural land to grow cash crop plantations (such as rubber, coffee and tea) [88,89]. While secondary forests and plantation forests may constitute viable habitats for widespread, generalist amphibian species, highly disturbed habitats tend to be dominated by only a few species of amphibian [27,90], and are unlikely to be suitable for evergreen forest specialists such as the *L. applebyi* group. Assuming all unprotected Broadleaf Evergreen Forest is lost or significantly degraded in the future, less than a quarter of the predicted historical range of the species group is likely to remain in the future, all within current protected areas.

Our modelling allowed us to predict not only the distribution of the species group, but also potential diversity in the group not sampled during our study. The predicted distribution of the *Leptotalax applebyi* group extended considerably into seven watershed basins and that we

did not sample, and given the association of identified lineages with watershed basins, we speculate that there may be a number of additional lineages that we did not sample. While the predicted distribution of the species group in these watershed basins is still substantially forested (>50% Broadleaf Evergreen Forest) in two of the seven watershed basins, in five of the seven watershed basins less than 1% this forest is currently protected.

Given the rate of deforestation occurring in the region, it is quite possible that, if *L. applebyi* group frogs do exist in these areas, they may not do so for long, or they may have already been extirpated. Recent estimates of the proportion of undiscovered extinct species ranged from 0.15 to 0.59, depending on the taxonomic group and geographic area considered [91]. In Central America, there are already documented cases of amphibian species being driven to extinction before they are described [92–94]. Although no Southeast Asian amphibian is known to have been driven to extinction [95], it is possible that extinctions of undescribed amphibian species have gone unnoticed. In order to prevent this from happening (perhaps further) in the Central Highlands of Vietnam, future survey efforts for the *L. applebyi* group should focus on these more poorly surveyed and highly threatened watershed basins to the east of the Central Highlands, including parts of Quang Ngai, Binh Dinh, Phu Yen, and Binh Thuan Provinces.

There is an urgent need to gain a greater understanding of the biodiversity of the Central Highlands of Vietnam and beyond in order to prioritize biodiversity conservation, particularly that under threat from ongoing deforestation. Prioritizing habitats for conservation often relies on estimation of species richness and endemism, and therefore an understanding of species boundaries and distributions. It is apparent from this, and other studies from around the world that current estimates of amphibian diversity based on morphology alone are misleading. When amphibian species groups have been examined in light of morphological and molecular and/or acoustic data, estimated species numbers have increased dramatically (eg. from 60 to 129 species, [96]; 16 to 47 [8]). Because naming species is necessary for species-based conservation [14], accurate alpha taxonomy is essential to effective conservation management.

## Supporting Information

**S1 Table. List of voucher specimens and GenBank accession numbers for all DNA sequences included in the analysis.**

(DOCX)

**S2 Table. List of voucher specimens examined morphologically.**

(DOCX)

**S3 Table. List of advertisement calls analysed and associated voucher specimens.**

(DOCX)

**S4 Table. Rotated factor loadings of a Principal Component Analysis of morphometric comparisons among males of the *L. applebyi* group.**

(DOCX)

**S5 Table. Factor loadings of a Principal Component Analysis of bioclimatic variables in the region.**

(DOCX)

## Acknowledgments

Field work was facilitated by Conservation International, The Institute of Ecology and Biological Resources, the Australian Museum, World Wildlife Fund Greater Mekong, and managers and staff at protected areas surveyed. Students from The Faculty of Biology, University of



Science, Ho Chi Minh City and many other institutions assisted with fieldwork. Jimmy A. McGuire, Bryan L. Stuart, Carol Spencer Prof. Dr. Wolfgang Böhme and David Kizirian, loaned specimens and/or tissues in their care. Ross Sadlier and Cecile Beatson provided support to JR. Pedro Peloso allowed us to use his photograph. DT also thanks Wolfgang Boehme and Thomas Ziegler for their advice and assistance.

## Author Contributions

Conceived and designed the experiments: JR DT. Performed the experiments: JR DT DL TN VD HH. Analyzed the data: JR DT GF. Wrote the paper: JR DT GF AD DL TN VD HH.

## References

1. Myers N, Knoll AH. The biotic crisis and the future of evolution. *Proc Natl Acad Sci USA*. 2001; 98(10): 5389–5392. PMID: [11344283](#)
2. Brooks TM, Mittermeier RA, Da-Fonseca GAB, Gerlach J, Hoffmann M, Lamoreux JF, et al. Global biodiversity conservation priorities. *Science*. 2006; 313: 58–61. PMID: [16825561](#)
3. Jenkins CN, Pimm SL, Joppa LN. Global patterns of terrestrial vertebrate diversity and conservation. *Proc Natl Acad Sci USA*. 2013; 110(28): E2602–E2610. doi: [10.1073/pnas.1302251110](#) PMID: [23803854](#)
4. Margules CR, Pressey RL. Systematic conservation planning. *Nature*. 2000; 405(6783): 243–253. PMID: [10821285](#)
5. Wilson KA, McBride MF, Bode M, Possingham HP. Prioritizing global conservation efforts. *Nature*. 2006; 440(7082): 337–340. PMID: [16541073](#)
6. Pfenninger M, Schwenk K. Cryptic animal species are homogeneously distributed among taxa and biogeographical regions. *BMC Evol Biol*. 2007; 7(1): 121.
7. Rissler LJ, Apodaca JJ. Adding more ecology into species delimitation: ecological niche models and phylogeography help define cryptic species in the black salamander (*Aneides flavipunctatus*). *Syst Biol*. 2007; 56(6): 924–942. PMID: [18066928](#)
8. Fouquet A, Santana Cassini C, Fernando Baptista Haddad C, Pech N, Trefaut Rodrigues M. Species delimitation, patterns of diversification and historical biogeography of the Neotropical frog genus *Adenomera* (Anura, Leptodactylidae). *J Biogeogr* 2014; 41(5): 855–870.
9. Bickford D, Lohman DJ, Sodhi NS, Ng PKL, Meier R, Winker K, et al. Cryptic species as a window on diversity and conservation. *Trends Ecol Evol*. 2007; 22(3): 148–155. PMID: [17129636](#)
10. Stuart SN, Chanson JS, Cox NA, Young BE, Rodrigues AS, Fischman DL, et al. Status and trends of amphibian declines and extinctions worldwide. *Science*. 2004; 306(5702): 1783–1786. PMID: [15486254](#)
11. Pimm SL, Jenkins C. Sustaining the variety of life. *Sci Am* 2005; 293(3): 66–73. PMID: [16121856](#)
12. Purvis A, Gittleman JL, Cowlishaw G, Mace GM. Predicting extinction risk in declining species. 2000; *Proc R Soc B* 267(1456): 1947–1952. PMID: [11075706](#)
13. Stuart BL, Inger RF, Voris HK. High level of cryptic species diversity revealed by sympatric lineages of Southeast Asian forest frogs. *Biol Lett*. 20062(3): 470–474.
14. Angulo A, Icochea J. Cryptic species complexes, widespread species and conservation: lessons from Amazonian frogs of the *Leptodactylus marmoratus* group (Anura: Leptodactylidae). *Syst Biodiv*. 2010; 8(3): 357–370.
15. Highton R, Maha GC, Maxson LR. Biochemical evolution in the slimy salamanders of the *Plethodon glutinosus* Complex in the Eastern United States. Illinois Biological Monograph 57. Urbana: University of Illinois Press; 1989.
16. Chek AA, Loughheed SC, Bogart JP, Boag PT. Perception and history: molecular phylogeny of a diverse group of Neotropical frogs, the 30-chromosome *Hyla* (Anura: Hylidae). *Mol Phylogenet Evol*. 2001; 18: 370–385. PMID: [11277631](#)
17. Cherty LM, Case SM, Wilson AC. Frog perspective on the morphological difference between humans and chimpanzees. *Science*. 1978; 200(4338): 209–211. PMID: [635583](#)
18. Hass CA, Dunski JF, Maxson LR. Divergent lineages within the *Bufo margaritifera* complex (Amphibia: Anura; Bufonidae) revealed by albumin immunology. *Biotropica* 1995; 27: 238–249.
19. Richards CM, Moore WS. A phylogeny for the African treefrog family Hyperoliidae based on mitochondrial DNA. *Mol Phylogenet Evol*. 1996; 5: 522–532. PMID: [8744765](#)

20. Hillis DM, Frost JS, Wright DA. Phylogeny and biogeography of the *Rana pipiens* complex: a biochemical evaluation. *Syst Biol.* 1983; 32: 132–143.
21. Wynn A, Heyer WR. Do geographically widespread species of tropical amphibians exist? An estimate of genetic relatedness within the neotropical frog *Leptodactylus fuscus* (Schneider 1799) (Anura Leptodactylidae) *Trop Zool.* 2001; 14(2): 255–285.
22. Gower DJ, Bahir MM, Mapatuna Y, Pethiyagoda R, Raheem D, Wilkinson M. Molecular phylogenetics of Sri Lankan *Ichthyophis* (Amphibia: Gymnophiona: Ichthyophiidae), with discovery of a cryptic species. *Raff Bull Zool.* 2005; 12: 153–161.
23. Zheng Y, Li S, Fu J. A phylogenetic analysis of the frog genera *Vibrissaphora* and *Leptobrachium*, and the correlated evolution of nuptial spine and reversed sexual size dimorphism. *Mol Phylogenet Evol.* 2008; 46(2): 695–707. PMID: [17981478](#)
24. Che J, Hu JS, Zhou WW, Murphy RW, Papenfuss TJ, Chen MY et al. Phylogeny of the Asian spiny frog tribe Paini (Family Dicroglossidae) sensu Dubois. *Mol Phylogenet Evol.* 2009; 50(1): 59–73. doi: [10.1016/j.ympev.2008.10.007](#) PMID: [18992827](#)
25. McLeod DS. Of Least Concern? Systematics of a cryptic species complex: *Limnonectes kuhlii* (Amphibia: Anura: Dicroglossidae). *Mol Phylogenet Evol.* 2010; 56(3): 991–1000. doi: [10.1016/j.ympev.2010.04.004](#) PMID: [20385247](#)
26. Sodhi NS, Koh LP, Brook BW, Ng PK. Southeast Asian biodiversity: an impending disaster. *Trends Ecol Evol.* 2004; 19(12): 654–660. PMID: [16701328](#)
27. Rowley J, Brown R, Bain R, Kusriani M, Inger R, Stuart B, et al. Impending conservation crisis for Southeast Asian amphibians. *Biol Lett* 2010; 6: 336–338. doi: [10.1098/rsbl.2009.0793](#) PMID: [20007165](#)
28. Frost DR. Amphibian Species of the World: an Online Reference. Version 6.0; 2014. American Museum of Natural History, New York, USA. Available: <http://research.amnh.org/herpetology/amphibia/index.html>. Accessed 30 September 2014.
29. Rowley J, Cao TT. A new species of *Leptotalax* (Anura: Megophryidae) from central Vietnam. *Zootaxa.* 2009; 2198: 51–60.
30. Rowley J, Stuart BL, Neang T, Emmett DA. A new species of *Leptotalax* (Anura: Megophryidae) from northeastern Cambodia. *Zootaxa.* 2010; 2567: 57–68.
31. Rowley J, Le DTT, Tran DTA, Hoang HD. A new species of *Leptotalax* (Anura: Megophryidae) from southern Vietnam. *Zootaxa.* 2011; 2796: 15–28.
32. Sung Y, Yang J, Wang Y. A New Species of *Leptotalax* (Anura: Megophryidae) from Southern China. *Asian Herpetol Res.* 2014; 5(2): 80–90.
33. Heyer WR, Garcia-Lopez JM, Cardoso AJ. Advertisement call variation in the *Leptodactylus mystaceus* species complex (Amphibia: Leptodactylidae) with a description of a new sibling species. *Amphibia-Reptilia.* 1996; 17(1): 7–31. PMID: [8889501](#)
34. Raxworthy CJ, Martinez-Meyer E, Horning N, Nussbaum RA, Schneider GE, Ortega-Huerta MA, et al. Predicting distributions of known and unknown reptile species in Madagascar. *Nature.* 2003; 426(6968): 837–841. PMID: [14685238](#)
35. Palumbi S. Simple fool's guide to PCR. Honolulu, HI: Department of Zoology, University of Hawaii; 1991.
36. Kocher TD, Thomas WK, Meyer A, Edwards SV, Pääbo S, Villablanca FX, et al. Dynamics of mitochondrial DNA evolution in animals: amplification and sequencing with conserved primers. *Proc Natl Acad Sci USA.* 1989; 86(16): 6196–6200. PMID: [2762322](#)
37. Santos JC, Cannatella DC. Phenotypic integration emerges from aposematism and scale in poison frogs. *Proc Natl Acad Sci USA.* 2011; 108: 6175–6180. doi: [10.1073/pnas.1010952108](#) PMID: [21444790](#)
38. Shimada T, Matsui M, Yambun P, Sudin A. A taxonomic study of Whitehead's torrent frog, *Meristogenys whiteheadi*, with descriptions of two new species (Amphibia: Ranidae). *Zool J Linnean Soc.* 2011; 161(1): 157–183.
39. Tamura K, Peterson D, Peterson N, Stecher G, Nei M, Kumar K. MEGA 5: molecular evolutionary genetics analysis using maximum likelihood, evolutionary distance, and maximum parsimony methods. *Mol Biol Evol.* 2011; 28: 2731–2739. doi: [10.1093/molbev/msr121](#) PMID: [21546353](#)
40. Ronquist F, Huelsenbeck JP. MrBayes 3: Bayesian phylogenetic inference under mixed models. *Bioinformatics.* 2003; 19(12): 1572–1574. PMID: [12912839](#)
41. Guindon S, Gascuel O. A simple, fast, and accurate algorithm to estimate large phylogenies by maximum likelihood. *Syst Biol.* 2003; 52(5): 696–704. PMID: [14530136](#)
42. Posada D. jModelTest: phylogenetic model averaging. *Mol Biol Evol.* 2008; 25(7): 1253–1256. doi: [10.1093/molbev/msn083](#) PMID: [18397919](#)

43. Rambaut A, Drummond AJ. Tracer v1. 4; 2007. Available: <http://beast.bio.ed.ac.uk/Tracer>.
44. Vences M, Wake D. Speciation, species boundaries and phylogeography of amphibians. In: Heatwole H, Tyler M, editors. Amphibian Biology, vol. 7. Amphibian Systematics. Chipping Norton, Australia: Surrey Beatty and Sons; 2007. pp. 2613–2671.
45. Flot JF. SeqPHASE: a web tool for interconverting PHASE input/output files and FASTA sequence alignments. Mol Ecol Resour. 2010; 10 (1): 162–166. doi: [10.1111/j.1755-0998.2009.02732.x](https://doi.org/10.1111/j.1755-0998.2009.02732.x) PMID: [21565002](https://pubmed.ncbi.nlm.nih.gov/21565002/)
46. Stephens M, Donnelly P. A comparison of Bayesian methods for haplotype reconstruction from population genotype data. Am J Hum Genet. 2003; 73: 1162–1169. PMID: [14574645](https://pubmed.ncbi.nlm.nih.gov/14574645/)
47. Heyer WR. The systematic status of *Adenomera griseigularis* Henle, with comments on systematic problems in the genus *Adenomera* (Amphibia, Leptodactylidae). Amphibia-Reptilia. 1984; 5(2): 97–100.
48. Duellman WE. The Hylid Frogs of Middle America. Monograph of the Museum of Natural History, University of Kansas. 1970; 1: 1–427.
49. Brown RM, Richards SJ. Two new frogs of the genus *Platymantis* (Anura: Ceratobatrachidae) from the Isabel Island group, Solomon Islands. Zootaxa. 2008; 1888: 47–68.
50. Cocroft RB, Ryan MJ. Patterns of advertisement call evolution in toads and chorus frogs. Anim Behav. 1995; 49(2): 283–303.
51. Padial JM, Castroviejo Fisher S, Köhler J, Vilà C, Chaparro JC, De la Riva I. Deciphering the products of evolution at the species level: the need for an integrative taxonomy. Zool Scripta. 2009; 38(4): 431–447.
52. Phillips SJ, Anderson RP, Schapire RE. Maximum entropy modeling of species geographic distributions. Ecol Model. 2006; 190(3–4): 231–259.
53. Elith J, Phillips SJ, Hastie T, Dudík M, Chee YE, Yates CJ. A statistical explanation of MaxEnt for ecologists. Divers Distrib. 2011; 17: 43–57.
54. Carpenter G, Gillison AN, Winter J. DOMAIN: a flexible modelling procedure for mapping potential distributions of plants and animals. Biodivers Conser. 1993; 2: 667–680.
55. Busby JR. BIOCLIM—A bioclimate analysis and prediction system. In Margules CR, Austin MP, editors. Nature Conservation: Cost Effective Biological Surveys and Data Analysis. Melbourne: CSIRO; 1991. pp 64–68
56. Elith J, Graham CH, Anderson RP, Dudík M, Ferrier S, Guisan A, et al. Novel methods improve prediction of species' distributions from occurrence data. Ecography. 2006; 29: 129–151. PMID: [16622301](https://pubmed.ncbi.nlm.nih.gov/16622301/)
57. Hernandez PA, Graham CH, Master LL, Albert DL. The effect of sample size and species characteristics on performance of different species distribution modeling methods. Ecography. 2006; 29: 773–785.
58. Hijmans RJ, Cameron SE, Parra JL, Jones PG, Jarvis A. Very high resolution interpolated climate surfaces for global land areas. Int J Climatol. 2005; 25: 1965–1978.
59. Pie MR, Meyer ALS, Firkowski CR, Ribeiro LF, Bornschein MR. Understanding the mechanisms underlying the distribution of microendemic montane frogs (*Brachycephalus* spp., Terrarana: Brachycephalidae) in the Brazilian Atlantic Rainforest. Ecol Model. 2013; 250: 165–176. doi: [10.1016/j.expneurol.2013.09.021](https://doi.org/10.1016/j.expneurol.2013.09.021) PMID: [24100021](https://pubmed.ncbi.nlm.nih.gov/24100021/)
60. Pearson RG, Raxworthy CJ, Nakamura M, and Peterson AT. Predicting species distributions from small numbers of occurrence records: a test case using cryptic geckos in Madagascar. J Biogeogr. 2007; 34: 102–117.
61. Wisz MS, Hijmans RJ, Li J, Peterson AT, Graham CH, Guisan A, et al. Effects of sample size on the performance of species distribution models. Diversity Distrib. 2008; 14: 763–773.
62. Franklin J. Mapping Species Distributions: Spatial Inference and Prediction. Cambridge and New York: Cambridge University Press; 2010.
63. Ben-David A. About the relationship between ROC curves and Cohen's kappa. Eng Appl Artif Intell. 2008; 21: 874–82.
64. Phillips SJ, Dudík M. Modeling of species distributions with Maxent: new extensions and a comprehensive evaluation. Ecography 2008; 31: 161–175.
65. Manel S, Williams HC, Ormerod SJ. Evaluating presence–absence models in ecology: the need to account for prevalence. J Appl Ecol. 2001; 38(5): 921–931.
66. Liu C, Berry PM, Dawson TP, Pearson RG. Selecting thresholds of occurrence in the prediction of species distributions. Ecography. 2005; 28: 385–393.
67. Tateishi R, Hoan NT, Kobayashi T, Alsaaidh B, Tana G, Phong DX. Production of Global Land Cover Data—GLCNMO2008. J Geog Geol. 2014; 6(3): 99–122.

68. IUCN, UNEP. The World Database on Protected Areas (WDPA); 2014. Cambridge, UK: UNEP-WCMC.
69. Lehner B, Verdin K, Jarvis A. New global hydrography derived from spaceborne elevation data. *Eos, Trans Amer Geophys Union*. 2008; 89(10): 93–94.
70. Graham CH., Ron SR, Santos JC, Schneider C J, Moritz C. Integrating phylogenetics and environmental niche models to explore speciation mechanisms in dendrobatid frogs. *Evolution*. 2004; 58(8): 1781–1793. PMID: [15446430](#)
71. Kozak KH, Wiens JJ. Accelerated rates of climatic-niche evolution underlie rapid species diversification. *Ecol Lett*. 2010; 13(11): 1378–1389. doi: [10.1111/j.1461-0248.2010.01530.x](#) PMID: [20875038](#)
72. Urbina-Cardona JN, Flores-Villela OSCAR. Ecological-niche modeling and prioritization of conservation-area networks for Mexican herpetofauna. *Conserv Biol*. 2010; 24(4): 1031–1041. doi: [10.1111/j.1523-1739.2009.01432.x](#) PMID: [20345399](#)
73. Degnan JH, Rosenberg NA. Gene tree discordance, phylogenetic inference and the multispecies coalescent. *Trends Ecol Evol*. 2009; 24: 332–340. doi: [10.1016/j.tree.2009.01.009](#) PMID: [19307040](#)
74. Edwards SV, Beerli P. Perspective: gene divergence, population divergence, and the variance in coalescence time in phylogeographic studies. *Evolution*. 2000; 54: 1839–1854. PMID: [11209764](#)
75. Freilich X, Tollis M, Boissinot S. Hiding in the highlands: Evolution of a frog species complex of the genus *Ptychadena* in the Ethiopian highlands. *Mol Phylogenet Evol*. 2014; 71: 157–169. doi: [10.1016/j.ympev.2013.11.015](#) PMID: [24315867](#)
76. Vences M, Thomas M, Van der Meijden A, Chiari Y, Vieites DR. Comparative performance of the 16S rRNA gene in DNA barcoding of amphibians. *Front Zool* 2005; 2(1): 5. PMID: [15771783](#)
77. Pabijan M, Wollenberg KC, Vences M. Small body size increases the regional differentiation of populations of tropical mantellid frogs (Anura: Mantellidae). *J Evol Biol*. 2012; 25(11): 2310–2324. doi: [10.1111/j.1420-9101.2012.02613.x](#) PMID: [22998688](#)
78. Pilliod DS, Peterson CR, Ritson PI. Seasonal migration of Columbia spotted frogs (*Rana luteiventris*) among complementary resources in a high mountain basin. *Can J Zool*. 2002; 80(11): 1849–1862.
79. Gaston KJ. Species-range-size distributions: patterns, mechanisms and implications. *Trends Ecol Evol*. 1996; 11(5): 197–201. PMID: [21237808](#)
80. Wollenberg KC, Vieites DR, Glaw F, Vences M. Speciation in little: the role of range and body size in the diversification of Malagasy mantellid frogs. *BMC Evol Biol* 2011; 11(1): 217.
81. Spight TM. The water economy of salamanders: evaporative water loss. *Physiol Zool*. 1968; 41: 195–203.
82. Gerhardt HC. The evolution of vocalization in frogs and toads. *Annu Rev Ecol Syst*. 1994; 25: 293–324.
83. Ryan MJ, Kime NM. Selection on long-distance acoustic signals. In: Simmons AM, Popper AN, Fay RR, editors, *Acoustic Communication*. New York: Springer; 2003. pp. 225–274.
84. Boul KE, Funk WC, Darst CR, Cannatella DC, Ryan MJ. Sexual selection drives speciation in an Amazonian frog. *Proc R Soc London B*. 2007; 274: 399–406.
85. Pfenninger M, Schwenk K. Cryptic animal species are homogeneously distributed among taxa and biogeographical regions. *BMC Evol Biol*. 2007; 7(1): 121.
86. Brook BW, Bradshaw CJ, Koh LP, Sodhi NS. Momentum drives the crash: mass extinction in the tropics. *Biotropica*. 2006; 38(3): 302–305.
87. Meyfroidt P, Lambin EF. The causes of the reforestation in Vietnam. *Land Use Policy* 2008; 25(2): 182–197.
88. Stibig H-J, Belward AS, Roy PS, Rosalina-Wasrin U, Agrawal S, Joshi PK, et al. A land-cover map for South and Southeast Asia derived from SPOT-VEGETATION data. *J Biogeog*. 2007; 34: 625–637.
89. Meyfroidt P, Vu TP, Hoang VA. Trajectories of deforestation, coffee expansion and displacement of shifting cultivation in the Central Highlands of Vietnam. *Global Environ Chang*. 2013; 23(5): 1187–1198. doi: [10.1016/j.bmcl.2013.01.029](#) PMID: [23385210](#)
90. Rowley JLL, Stuart BL. Amphibian conservation in Vietnam, Laos and Cambodia. In: Heatwole H, Das I, editors. *Conservation Biology of Amphibians of Asia: Status of Conservation and Decline of Amphibians in Eastern Hemisphere*; 2014. pp 264–280.
91. Tedesco PA, Bigorne R, Bogan AE, Giam X, Jézéquel C, Huguéy B. Estimating how many undescribed species have gone extinct. *Conserv Biol* 2014; 28 (5): 1360–1370. doi: [10.1111/cobi.12285](#) PMID: [24684650](#)
92. Crawford AJ, Lips KR, Bermingham E. Epidemic disease decimates amphibian abundance, species diversity, and evolutionary history in the highlands of central Panama *Proc Natl Acad Sci USA*. 2010; 107 (31): 13777–13782. doi: [10.1073/pnas.0914115107](#) PMID: [20643927](#)

93. Coloma LA, Duellman WE, Almendariz A, Ron SR. Five new (extinct?) species of *Atelopus* (Anura: Bufonidae) from Andean Colombia, Ecuador, and Peru. *Zootaxa* 2010; 2574: 1–54.
94. Mendelson JR III, Mulcahy DG. A new species of toad (Bufonidae: *Incilius*) from central Panama. *Zootaxa* 2010; 2396: 61–68.
95. IUCN. The IUCN Red List of Threatened Species. Version 2014.3; 2014. Available: <http://www.iucnredlist.org>. Accessed 8 December 2014.
96. Fouquet A, Gilles A, Vences M, Marty C, Blanc M, Gemmill NJ. Underestimation of species richness in Neotropical frogs revealed by mtDNA analyses. *PLOS ONE* 2007; 2(10): e1109. PMID: [17971872](https://pubmed.ncbi.nlm.nih.gov/17971872/)
